# Supplementary material
Source: PubMed Central journal article supplement (PMC2877276)
Supplement: NIHMS127059-supplement-1.pdf [file NIHMS127059-supplement-1.pdf]

## **Material and Methods**

### **Animals and Transverse Aortic Constriction (TAC)**

Adult (12-15 weeks) high-expressing Line 720 SUR1-tg mice <sup>1</sup> and their WT littermates were used in this study. Kir6.2 KO mice <sup>2</sup> backcrossed for five generations into a C57BL/6 background were further crossed into a C57BL/6 background 2 additional times to generate heterozygous Kir6.2 mice as breeders. The homozygous Kir6.2 KO and wild type littermates produced were used for the study. PGC1 $\alpha$  KO mice were generated as previously described <sup>3</sup>. All animal studies were performed according to a protocol approved by the University of Minnesota Institutional Animal Care and Use Committee. Severe TAC (using a 27G needle to calibrate the degree of aortic constriction) was performed in SUR1-tg mice as described <sup>4, 5</sup>. Previous studies demonstrated that severe TAC caused a high mortality rate in both Kir6.2 KO <sup>6</sup> and PGC1 $\alpha$  KO mice; consequently, to allow a 6 week observation period in these strains, moderate TAC (using a 26G needle to calibrate the degree of aortic constriction) was performed. Echocardiography was performed while the mice were anesthetized with 1.5% isoflurane by inhalation.

### **Western Blots and Quantitative Real-time PCR**

Primary antibody against ANP was from Peninsula Lab., Bachem AG; antibodies against PGC-1 $\alpha$ , COXI, COXIII, UCP3, and SUR2A were from Santa Cruz Biotech; antibodies against cytochrome C, phos-Akt<sup>Ser472</sup>, total-Akt, phos-FOXO1<sup>Thr24</sup>, total-FOXO1 were from Cell Signaling, and antibody against CPT-1b was from Alpha

Diagnostics. HRP conjugated secondary antibodies were from BioRad Laboratories and Sigma.

Total RNA was reverse-transcribed using random hexamers and Moloney murine leukemia virus (MMLV) reverse transcriptase (Clontech). The real-time PCR reaction was carried out using the Light Cycler Thermocycler (Roche Diagnostics Corp). Primers are listed in Online Table II. Results were normalized to  $\alpha$ -sarcomeric actin.

### **Cell Culture, Transfection, Reporter Gene Assay**

Rat neonatal cardiomyocytes were isolated and cultured as described previously <sup>7</sup>. Reporter genes were transfected with Lipofectamine 2000 (Invitrogen) and SUR2 specific siRNA or ON-TARGETplus siCONTROL. Non-Targeting siRNA (Dharmacon) were transfected with DharmaFECT 3 reagent (Dharmacon) into neonatal cardiomyocytes. Forty-eight hours after transfection, cells were treated with 50 $\mu$ M glibenclamide or vehicle (DMSO) for 45 minutes and then subjected to 24 hours of hypoxia (1% O<sub>2</sub>) followed by 7-8 hours of reoxygenation. After hypoxia/reoxygenation (H/R), cells were harvested for reporter assay or for real-time PCR and Western blot analysis.

Reporter constructs were generated by inserting 3.1Kb PGC-1 $\alpha$  promoter <sup>8</sup> into pGL3B vector (Promega). The mutations were introduced into the wild type reporter using QuickChange Multi Site-Directed Mutagenesis Kit (Stratagene). LacZ reporter driven by CMV promoter was used as an internal control for transfection, and relative luciferase activity was determined by normalizing luciferase activity to the corresponding LacZ activity.

### **Preparation of Nuclear Extract**

Frozen heart tissue was ground in liquid nitrogen into fine powder and homogenized in hypotonic buffer. Rat neonatal cardiomyocytes were washed in DPBS (Invitrogen) and resuspended in hypotonic buffer. Then nuclear extract was prepared as described<sup>9</sup>.

### **ChIP Assay**

ChIP assay was performed as described<sup>10</sup>. DNA was purified from the immunocomplex precipitated with anti-FOXO1 antibody and subjected to real-time PCR. Chromatin solutions with non-specific IgG were used as control for total input.

### **Statistical Analysis**

Results are expressed as mean  $\pm$  standard error of the mean (SEM). The number of samples in each group for each experiment was at least six or as indicated in the legends. An unpaired two-tailed Student's t-test was used to determine  $p$  values. A  $p$  value of  $\leq 0.05$  was considered significant.

## References

1. Flagg TP, Remedi MS, Masia R, Gomes J, McLerie M, Lopatin AN, Nichols CG. Transgenic overexpression of SUR1 in the heart suppresses sarcolemmal KATP. *Journal of Molecular and Cellular Cardiology*. 2005;39:647-656.
2. Miki T, Nagashima K, Tashiro F, Kotake K, Yoshitomi H, Tamamoto A, Gono T, Iwanaga T, Miyazaki J-i, Seino S. Defective insulin secretion and enhanced insulin action in K ATP channel-deficient mice. *Proceedings of the National Academy of Sciences of the United States of America*. 1998;95:10402-10406.
3. Leone TC, Lehman JJ, Finck BN, Schaeffer PJ, Wende AR, Boudina S, Courtois M, Wozniak DF, Sambandam N, Bernal-Mizrachi C, Chen Z, O. Holloszy J, Medeiros DM, Schmidt RE, Saffitz JE, Abel ED, Semenkovich CF, Kelly DP. PGC-1 $\alpha$  Deficiency Causes Multi-System Energy Metabolic Derangements: Muscle Dysfunction, Abnormal Weight Control and Hepatic Steatosis. *PLoS Biology*. 2005;3:e101.
4. Xu X, Fassett J, Hu X, Zhu G, Lu Z, Li Y, Schnermann J, Bache RJ, Chen Y. Ecto-5'-Nucleotidase Deficiency Exacerbates Pressure-Overload-Induced Left Ventricular Hypertrophy and Dysfunction. *Hypertension*. 2008;51:1557-1564.
5. Zhang P, Xu X, Hu X, van Deel ED, Zhu G, Chen Y. Inducible Nitric Oxide Synthase Deficiency Protects the Heart From Systolic Overload-Induced Ventricular Hypertrophy and Congestive Heart Failure. *Circ Res*. 2007;100:1089-1098.
6. Yamada S, Kane GC, Behfar A, Liu X-K, Dyer RB, Faustino RS, Miki T, Seino S, Terzic A. Protection conferred by myocardial ATP-sensitive K<sup>+</sup> channels in pressure

overload-induced congestive heart failure revealed in KCNJ11 Kir6.2-null mutant. *J Physiol.* 2006;577:1053-1065.

7. Ahmad F, Arad M, Musi N, He H, Wolf C, Branco D, Perez-Atayde AR, Stapleton D, Bali D, Xing Y, Tian R, Goodyear LJ, Berul CI, Ingwall JS, Seidman CE, Seidman JG. Increased  $\alpha$ 2 Subunit-Associated AMPK Activity and PRKAG2 Cardiomyopathy. *Circulation.* 2005;112:3140-3148.
8. Czubryt MP, McAnally J, Fishman GI, Olson EN. Regulation of peroxisome proliferator-activated receptor gamma coactivator 1alpha (PGC-1alpha ) and mitochondrial function by MEF2 and HDAC5. *Proceedings of the National Academy of Sciences.* 2003;100:1711-1716.
9. Wei L-N, Hu X, Chinpaisal C. Constitutive Activation of Retinoic Acid Receptor beta 2 Promoter by Orphan Nuclear Receptor TR2. *J Biol Chem.* 2000;275:11907-11914.
10. Hu X, Chen Y, Farooqui M, Thomas MC, Chiang C-M, Wei L-N. Suppressive Effect of Receptor-interacting Protein 140 on Coregulator Binding to Retinoic Acid Receptor Complexes, Histone-modifying Enzyme Activity, and Gene Activation. *J Biol Chem.* 2004;279:319-325.

Online Table I. Disruption of  $K_{ATP}$  channel activity exacerbated LV dysfunction in response to TAC

|                                 | <b>WT sham<br/>(n=10)</b> | <b>WT TAC<br/>(n=10)</b> | <b>SUR1-tg<br/>sham<br/>(n=10)</b> | <b>SUR1-tg<br/>TAC<br/>(n=9)</b> |
|---------------------------------|---------------------------|--------------------------|------------------------------------|----------------------------------|
| Body weight (g)                 | 20.0±0.6                  | 21.5±0.6                 | 20.3±0.7                           | 20.8±0.4                         |
| Heart weight (mg)               | 86.2±2.3                  | 142.9±7.6                | 89.6±1.7                           | 154.6±4.3                        |
| Lung weight (mg)                | 128.5±3.3                 | 235.3±25.4               | 126.9±3.7                          | 366.9±31.7*#                     |
| Heart rate (min <sup>-1</sup> ) | 516±12                    | 468±19*                  | 481±11#                            | 449±20*                          |
| LV diameter systole (mm)        | 2.11±0.08                 | 2.42±0.20                | 1.97±0.11                          | 3.18±0.18*#                      |
| LV diameter diastole (mm)       | 3.33±0.06                 | 3.78±0.11*               | 3.22±0.12                          | 4.02±0.15*                       |
| Wall thickness systole (mm)     | 0.98±0.02                 | 1.24±0.03*               | 0.99±0.01                          | 1.23±0.03*                       |
| Wall thickness diastole (mm)    | 0.65±0.01                 | 0.93±0.02*               | 0.70±0.01                          | 0.97±0.02*                       |
| LV ejection fraction (%)        | 74.1±1.9                  | 71.9±5.0                 | 76.8±1.9                           | 49.9±5.1*#                       |
| %FS                             | 36.7±1.7                  | 36.6±3.8                 | 39.0±1.7                           | 21.3±2.7*#                       |

\* p<0.05 versus sham, # p<0.05 versus WT littermate

Online Table II. Primers used in real-time PCR, ChIP assay and point mutation

|                        | <b>sense</b>                                              | <b>antisense</b>                   |
|------------------------|-----------------------------------------------------------|------------------------------------|
| <i>Real-time PCR</i>   |                                                           |                                    |
| ANP                    | 5'-TCGTCTTGGCCTTTTGGCT-3'                                 | 5'-TCCAGGTGGTCTAGCAGGTTCT-3'       |
| BNP                    | 5'-AGGGAGAACACGGCATCATT-3'                                | 5'-GACAGCACCTTCAGGAGAT-3'          |
| VLCAD                  | 5'-ATGCAGTCGGCTCGGATGACCC-3'                              | 5'-TGAGAAATTGTGCCTGTTCTTC-3'       |
| VLCAD (rat)            | 5'-TCTTGTGCTTCATCAGCTTCG-3'                               | 5'-TGAGTCGCAGTGGTGAAGTGG-3'        |
| MCAD                   | 5'-CTAACCCAGATCCTAAAGTACCCG-3'                            | 5'-GGTGTGGCTTCCA AATGA-3'          |
| CPT1b                  | 5'-GAGTTCTCGATGGCTTTCCG-3'                                | 5'-GACAGGACACTGTGTGGGTGAG-3'       |
| CPT1b(rat)             | 5'-GCAGTTCCAGAGAATCCTCG-3'                                | 5'-GCCCACTCTACCCTTCCTCCTG-3'       |
| COX I                  | 5'-TGAAACCCCCAGCCATAAC-3'                                 | 5'-CCAGCGGGATCAAAGAAAG-3'          |
| COXIII                 | 5'-CATCGTCTCGGAAGTATTTTT-3'                               | 5'-ATTAGTAGGGCTTGATTTATGTGG-3'     |
| PGC-1 $\alpha$         | 5'-AACTCAGCAAGTCCTCAGGGCT-3'                              | 5'-TTAGTTCACTGGTCTTGTCTGA-3'       |
| PGC-1 $\alpha$ (rat)   | 5'-GTTCAAGTCCACCCTACAGCCG-3'                              | 5'-CTTTCGTGCTCATTGGCTTCAT-3'       |
| PGC-1 $\beta$          | 5'-CACGGTTTTATCACCTTCCG-3'                                | 5'-GCTCATTGCGCTTCTCAGG-3'          |
| ERR $\alpha$           | 5'-TGGAGCGGGAGGAGTACGTC-3'                                | 5'-CAGCCTCAGCATCTTCAATGTG-3'       |
| ERR $\gamma$           | 5'-CTCTGTGACTTGGCTGACCG-3'                                | 5'-CCAGGGACAGTGTGGAGAAGC-3'        |
| PPAR $\alpha$          | 5'-TTGTGGCCAAGATGGTGGCCAA-3'                              | 5'-CAGTTCTAAGGCATTGAACTTC-3'       |
| PPAR $\gamma$          | 5'-CAAAGTAGAACCTGCATCTCC-3'                               | 5'-CCTTCACAAGCATGAACTCC-3'         |
| Tfam                   | 5'-GTCCATAGGCACCGTATTGC-3'                                | 5'-CCCATGCTGGAAAAACACTT-3'         |
| NRF1                   | 5'-GGCGGGAGGATCTTTTATATGCTTTTGA-3'                        | 5'-GGCCTCTGATGCTTGCCTCGTCT-3'      |
| <i>ChIP Assay</i>      |                                                           |                                    |
| Site 1                 | 5'-TCCCCATTGACTCAGGTACGAC-3'                              | 5'-GTGCCCTGGGTTGTACAGTTTGTT-3'     |
| Site 2                 | 5'-ACTGCCAAGGAGACAGCTGATTTG-3'                            | 5'-CCCTATTCCTTCCTTTCTTTCTTCCTCC-3' |
| Site 3                 | 5'-GGCAAGGGTGTAGCTACTGTGTCA-3'                            | 5'-CCAGCTTGAATGCCACCAACTCT-3'      |
| <i>Point Mutations</i> |                                                           |                                    |
|                        | 5'-GATACCATTTAGTGT <u>GGAT</u> CCTTCATTCCCTGGA-3' (sense) |                                    |
|                        | 5'-AAACAAATGTGGCGGT <u>ACCG</u> TGACTAAACATGGA-3' (sense) |                                    |
|                        | 5'-TTGCTATTTGCCTGTT <u>CCGG</u> ATGGAAAATAAATT-3' (sense) |                                    |

Primers were designed according to mouse cDNA or genomic DNA sequences if not specifically labeled. For point mutations, only sense primers were used for mutagenesis of the reporter gene. The mutated nucleotides were in italic and underlined.

Online Figure I

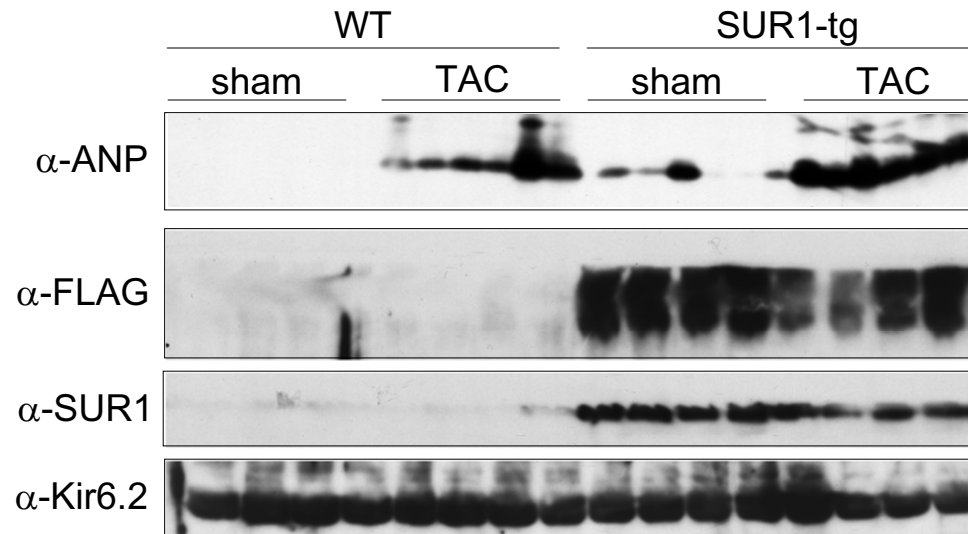

Online Figure I. Myocardial ANP expression was significantly increased in the SUR1-tg mice. The protein level of the pore forming subunit Kir6.2 was not changed in the SUR1-tg mice or in response to TAC.



Online Figure II

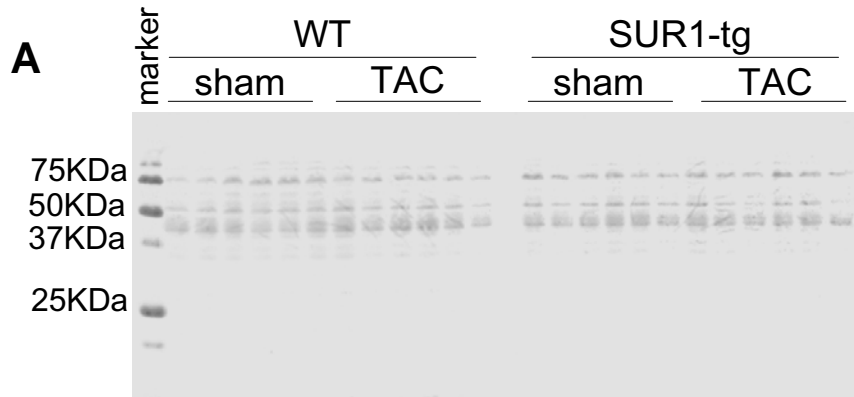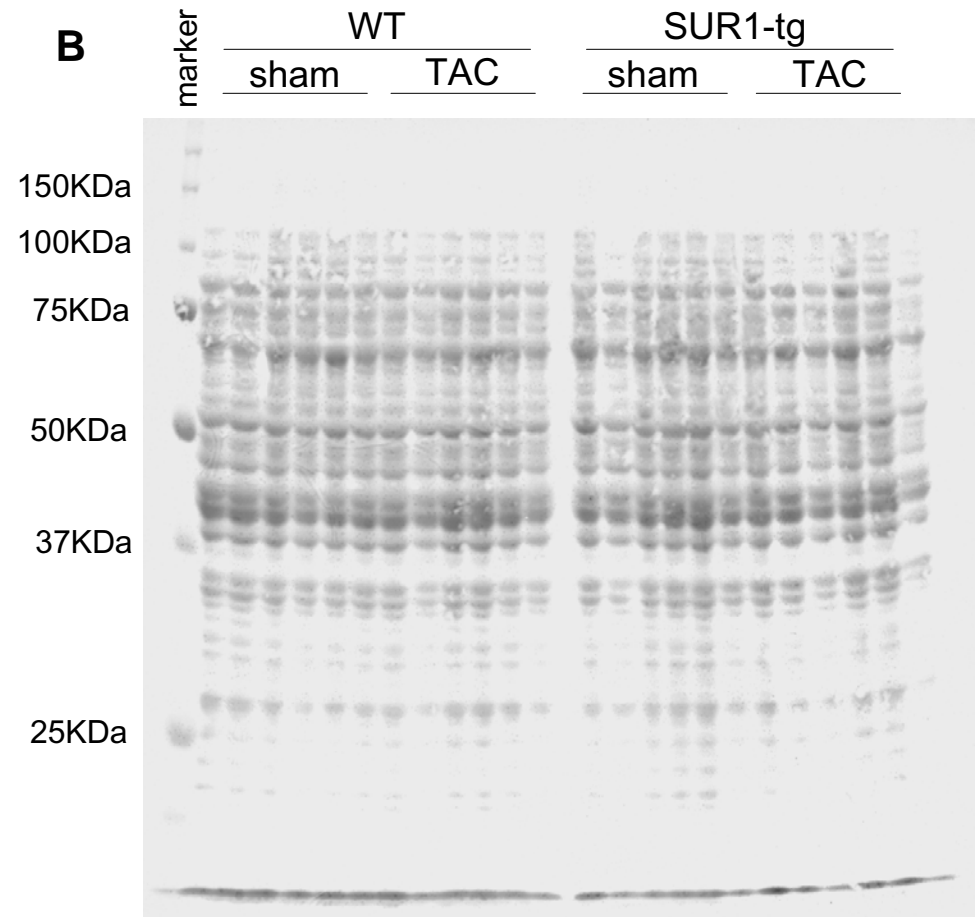

Online Figure II. Ponceau S staining of the blots on PVDF membrane before Western blot for sample loading control of Figure 3A and Figure 3B. A, 25 $\mu$ g of total lysate resolved on 15% SDS-PAGE (gel used for Figure 3A); B, 75 $\mu$ g of total lysate resolved on 10% SDS-PAGE (gel used for Figure 3B).

Online Figure III

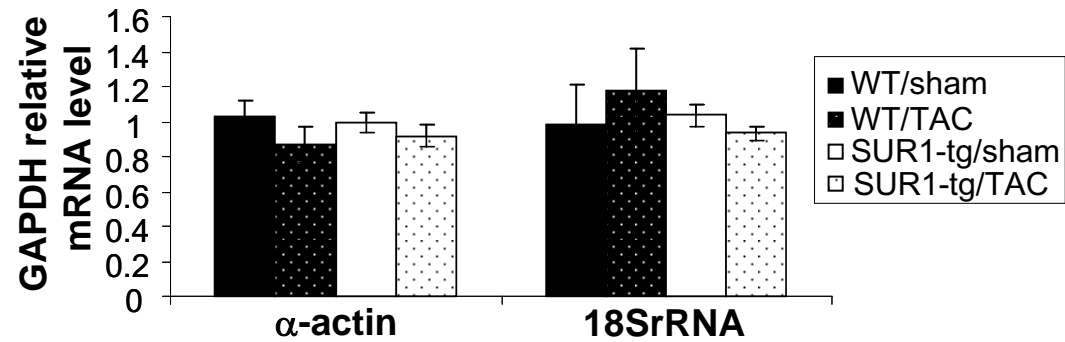

Online Figure III. The mRNA levels of GAPDH in the SUR1-tg and WT mice after normalized to  $\alpha$ -actin and 18SrRNA. The RT and real-time PCR results in this study were normalized to  $\alpha$ -actin.

Online Figure IV

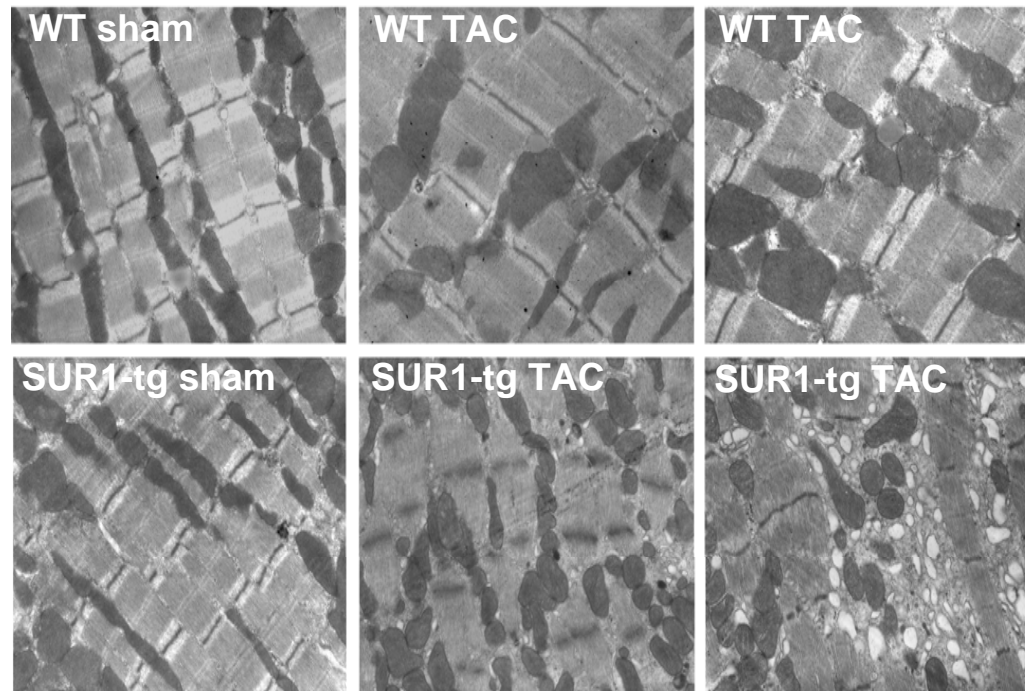

Online Figure IV. Following TAC the mitochondria volume density is not significantly different between the SUR1-tg and WT mice.
